# Supplementary material for: Dormant phages of Helicobacter pylori reveal distinct populations in Europe
Source: PubMed Central journal article supplement (PMC4585682; doi:10.1038/srep14333), 2015-09-21
Supplement: srep14333-s1.pdf [file srep14333-s1.pdf]

**Dormant phages of *Helicobacter pylori* reveal distinct populations in Europe**

**F. F. Vale, J. Vadivelu, M. Oleastro, S. Breurec, L. Engstrand, T. T. Perets, F. Mégraud, P. Lehours**

**Supplementary Information**

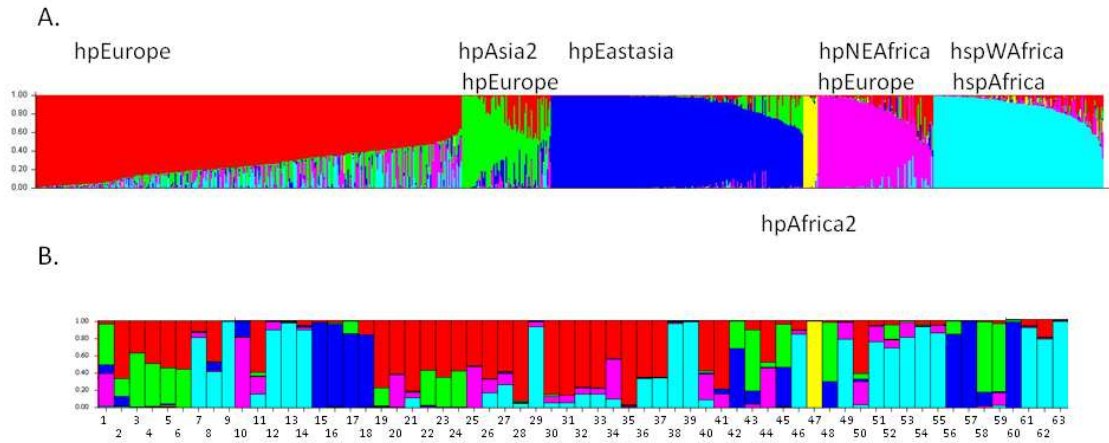

**Fig S1.** Bayesian population assignments using STRUCTURE 2.3.4. A. Plot of the population assignment of 741 sequences available at PubMLST plus an additional 63 sequences of strains carrying prophages using an admixture model ( $K=6$ ). Each bacterial isolate is depicted by a thin vertical line, which is divided into  $K$  coloured segments representing the membership coefficients in each cluster. The identification of the population attributed to the strains according to information available at PubMLST is found above and below the figure. B. Detailed plot of the strains carrying prophages (strain numbers above are depicted in Supplementary Table S2).

**Table S1. *Helicobacter pylori* genomes carrying prophage integrase and holin genes retrieved from public databases.**

| Genome   | BLAST Database        | BLAST results |                    |            |                   | Observation                                                                                                                                                    |
|----------|-----------------------|---------------|--------------------|------------|-------------------|----------------------------------------------------------------------------------------------------------------------------------------------------------------|
|          |                       | Integrase     |                    | Holin      |                   |                                                                                                                                                                |
|          |                       | Query cov.    | E-value            | Query cov. | E-value           |                                                                                                                                                                |
| Cuz20    | nucleotide collection | 95%           | 2e <sup>-143</sup> | 90%        | 2e <sup>-40</sup> |                                                                                                                                                                |
| E48      | WGS                   | 95%           | 2e <sup>-163</sup> | 100%       | 1e <sup>-61</sup> |                                                                                                                                                                |
| FD430    | WGS                   | 80%           | 9e <sup>-86</sup>  | 91%        | 4e <sup>-34</sup> |                                                                                                                                                                |
| FD719    | WGS                   | 97%           | 5e <sup>-139</sup> | 99%        | 1e <sup>-55</sup> |                                                                                                                                                                |
| GAM105Ai | WGS                   | 97%           | 5e <sup>-120</sup> | 96%        | 1e <sup>-42</sup> |                                                                                                                                                                |
| GAM83T   | WGS                   | 97%           | 3e <sup>-123</sup> | 94%        | 5e <sup>-40</sup> | Minor differences in relation to genome GAM83Bi, which was not included. No information available but probably isolates from the same individual               |
| H-34H    | WGS                   | 100%          | 5e <sup>-81</sup>  | 100%       | 2e <sup>-39</sup> |                                                                                                                                                                |
| Hp A-20  | WGS                   | 97%           | 4e <sup>-115</sup> | 96%        | 2e <sup>-44</sup> |                                                                                                                                                                |
| Hp A-4   | WGS                   | 97%           | 2e <sup>-119</sup> | 93%        | 4e <sup>-35</sup> |                                                                                                                                                                |
| Hp H-41  | WGS                   | 98%           | 1e <sup>-122</sup> | 91%        | 2e <sup>-38</sup> |                                                                                                                                                                |
| Hp P-4   | WGS                   | 97%           | 1e <sup>-135</sup> | 100%       | 6e <sup>-71</sup> | Minor differences in relation to genomes Hp P-4c and Hp P-4d, which were not included. No information available but probably isolates from the same individual |
| India7   | nucleotide collection | 98%           | 1e <sup>-165</sup> | 100%       | 1e <sup>-60</sup> |                                                                                                                                                                |
| NQ4044NQ | WGS                   | 98%           | 9e <sup>-124</sup> | 96%        | 5e <sup>-59</sup> |                                                                                                                                                                |
| NY4-84   | WGS                   | 98%           | 4e <sup>-96</sup>  | 96%        | 1e <sup>-61</sup> |                                                                                                                                                                |
| PZ5080   | WGS                   | 100%          | 2e <sup>-39</sup>  | 96%        | 5e <sup>-40</sup> | The complete <i>atpA</i> gene sequence was not found. Not included.                                                                                            |
| SA156A   | WGS                   | 97%           | 9e <sup>-143</sup> | 100%       | 5e <sup>-39</sup> | Identical to the genome SA156C that was isolated from the same individual. Not included.                                                                       |
| SA160A   | WGS                   | 97%           | 4e <sup>-141</sup> | 100%       | 6e <sup>-52</sup> | Identical to the genome SA60C that was isolated from the same individual. Not included.                                                                        |
| SA161A   | WGS                   | 83%           | 3e <sup>-34</sup>  | 100%       | 2e <sup>-37</sup> | Identical to the genome SA161C that was isolated from the same individual. Not included.                                                                       |
| SA226A   | WGS                   | 100%          | 2e <sup>-55</sup>  | 100%       | 3e <sup>-56</sup> |                                                                                                                                                                |
| UM037    | nucleotide collection | 100%          | 3e <sup>-53</sup>  | 92%        | 2e <sup>-39</sup> |                                                                                                                                                                |
| UM038    | WGS                   | 98%           | 6e <sup>-94</sup>  | 91%        | 2e <sup>-46</sup> |                                                                                                                                                                |
| UM114    | WGS                   | 95%           | 3e <sup>-85</sup>  | 100%       | 6e <sup>-71</sup> |                                                                                                                                                                |
| wls-5-1  | WGS                   | 100%          | 3e <sup>-66</sup>  | 100%       | 3e <sup>-26</sup> | The genomes wls-5-1 to wls-5-18 also carry the genes, but correspond to isolates from the same individual. Only wls-5-1 was included.                          |

WGS - whole-genome shotgun contigs; Query cov. - query coverage.

**Table S2. *Helicobacter pylori* strains carrying integrase and holin genes.**

| #  | Strain       | Country of isolation | Associated disease | Population structure<br>(most probable population) |            |
|----|--------------|----------------------|--------------------|----------------------------------------------------|------------|
|    |              |                      |                    | <i>H. pylori</i><br>MLST                           | PST        |
| 1  | Sw-C577-G    | Sweden               | Gastritis          | hpEurope                                           | hpNEurope  |
| 2  | Sw-C520-G    | Sweden               | Gastritis          | hpEurope                                           | hpNEurope  |
| 3  | Sw-C388-G    | Sweden               | Gastritis          | hpEurope                                           | hpNEurope  |
| 4  | De-M53-M     | Germany              | MALT lymphoma      | hpEurope                                           | hpNEurope  |
| 5  | Sw-C166-G    | Sweden               | Gastritis          | hpEurope                                           | hpNEurope  |
| 6  | Sw-A626-G    | Sweden               | Gastritis          | hpEurope                                           | hpNEurope  |
| 7  | Sn-DAK16-U   | Senegal              | Peptic ulcer       | hspWAfrica                                         | hpAfrica1  |
| 8  | Fr-G12-G     | France               | Gastritis          | hpEurope                                           | hpEastAsia |
| 9  | Fr-B41-M     | France               | MALT lymphoma      | hspWAfrica                                         | hpSWEurope |
| 10 | Tw-254-U     | Taiwan               | Peptic ulcer       | hpNEAfrica                                         | hpEastAsia |
| 11 | Fr-B27-M     | France               | MALT lymphoma      | hpEurope                                           | hpAfrica1  |
| 12 | Sn-DAK40-U   | Senegal              | Peptic ulcer       | hspWAfrica                                         | hpAfrica1  |
| 13 | Sn-DAK34-U   | Senegal              | Peptic ulcer       | hspWAfrica                                         | hpAfrica1  |
| 14 | Sn-DAK56-G   | Senegal              | Gastritis          | hspWAfrica                                         | hpAfrica1  |
| 15 | Jp-206b-U    | Japan                | Peptic ulcer       | hpEastAsia                                         | hpEastAsia |
| 16 | Fr-B58-M     | France               | MALT lymphoma      | hpEastAsia                                         | hpEastAsia |
| 17 | Jp-G09-260-G | Japan                | Gastritis          | hpEastAsia                                         | hpEastAsia |
| 18 | Vn-HN75-G    | Vietnam              | Gastritis          | hpEastAsia                                         | hpEastAsia |
| 19 | Fr-2417-U    | France               | Peptic ulcer       | hpEurope                                           | hpAfrica1  |
| 20 | Pt-B101-G    | Portugal             | Gastritis          | hpEurope                                           | hpAfrica1  |
| 21 | Pt-B104-U    | Portugal             | Peptic ulcer       | hpEurope                                           | hpSWEurope |
| 22 | Sw-569-U     | Sweden               | Peptic ulcer       | hpEurope                                           | hpNEurope  |
| 23 | Uk-EN31-U    | United Kingdom       | Peptic ulcer       | hpEurope                                           | hpNEurope  |
| 24 | Uk-EN32-U    | United Kingdom       | Peptic ulcer       | hpEurope                                           | hpNEurope  |
| 25 | Pt-5322-G    | Portugal             | Gastritis          | hpEurope                                           | hpAfrica1  |
| 26 | Pt-4481-G    | Portugal             | Gastritis          | hpEurope                                           | hpAfrica1  |
| 27 | Pt-212-U     | Portugal             | Peptic ulcer       | hpEurope                                           | hpSWEurope |
| 28 | Pt-1293-U    | Portugal             | Peptic ulcer       | hpEurope                                           | hpAfrica1  |
| 29 | Pt-1918-U    | Portugal             | Peptic ulcer       | hspWAfrica                                         | hpSWEurope |
| 30 | Pt-B51-U     | Portugal             | Peptic ulcer       | hpEurope                                           | hpAfrica1  |
| 31 | Pt-B89-G     | Portugal             | Gastritis          | hpEurope                                           | hpAfrica1  |
| 32 | Pt-B92-G     | Portugal             | Gastritis          | hpEurope                                           | hpAfrica1  |
| 33 | Pt-259_01-G  | Portugal             | Gastritis          | hpEurope                                           | hpSWEurope |
| 34 | Pt-670_99-G  | Portugal             | Gastritis          | hpEurope                                           | hpAfrica1  |
| 35 | Pt-5303-G    | Portugal             | Gastritis          | hpEurope                                           | hpSWEurope |
| 36 | Pt-5771-G    | Portugal             | Gastritis          | hpEurope                                           | hpAfrica1  |
| 37 | Pt-5783-U    | Portugal             | Peptic ulcer       | hpEurope                                           | hpAfrica1  |
| 38 | Pt-6691-G    | Portugal             | Gastritis          | hspWAfrica                                         | hpSWEurope |
| 39 | Pt-4497-U    | Portugal             | Peptic ulcer       | hspWAfrica                                         | hpSWEurope |
| 40 | Il-3180-G    | Israel               | Gastritis          | hpEurope                                           | hpAfrica1  |
| 41 | Pt-4472-G    | Portugal             | Gastritis          | hpEurope                                           | hpSWEurope |

|    |             |              |                       |            |            |
|----|-------------|--------------|-----------------------|------------|------------|
| 42 | Pe-Cuz20    | Peru         | na                    | hpEastAsia | hpNEurope  |
| 43 | India7      | na           | na                    | hpAsia2    | hpNEurope  |
| 44 | My-UM037    | Malaysia     | na                    | hpEurope   | hpSWEurope |
| 45 | Ru-E48      | Russia       | na                    | hpAsia2    | hpNEurope  |
| 46 | Za-SA156A   | South Africa | na                    | hspSAfrica | hpNEurope  |
| 47 | Za-SA160A   | South Africa | na                    | hpAfrica2  | hpNEurope  |
| 48 | My-FD719-G  | Malaysia     | Gastritis             | hpAsia2    | hpNEurope  |
| 49 | Us-HpP4-G   | USA          | Gastritis             | hpAfrica1  | hpNEurope  |
| 50 | Co-NQ4044-I | Colombia     | Intestinal metaplasia | hpEurope   | hpAfrica1  |
| 51 | Gm-GAM83T   | The Gambia   | na                    | hspWAfrica | hpAfrica1  |
| 52 | Us-HpH41-U  | USA          | Peptic ulcer          | hpAfrica1  | hpAfrica1  |
| 53 | Gm-GAM105Ai | The Gambia   | na                    | hspWAfrica | hpAfrica1  |
| 54 | Us-HpA4-U   | USA          | Peptic ulcer          | hpAfrica1  | hpAfrica1  |
| 55 | Us-HpA20-U  | USA          | Peptic ulcer          | hpAfrica1  | hpAfrica1  |
| 56 | Cn-YN4-84   | China        | na                    | hpEastAsia | hpEastAsia |
| 57 | My-UM038    | Malaysia     | na                    | hpEastAsia | hpEastAsia |
| 58 | My-FD430-G  | Malaysia     | Gastritis             | hpAsia2    | hpEastAsia |
| 59 | My-UM114    | Malaysia     | na                    | hpAsia2    | hpEastAsia |
| 60 | Cn-wls5-1   | China        | na                    | hpEastAsia | hpEastAsia |
| 61 | Za-SA226A   | South Africa | na                    | hspWAfrica | hpSWEurope |
| 62 | Za-SA161A   | South Africa | na                    | hspWAfrica | hpSWEurope |
| 63 | Us-HpH-34-G | USA          | Gastritis             | hpAfrica1  | hpSWEurope |

na - information not available, MLST – multilocus sequence typing, PST - prophage sequence typing, MALT - mucosa associated lymphoid tissue.

**Table S3. Inferred ancestry of individuals according to the Bayesian analysis of *Helicobacter pylori* strains using Structure 2.3.4. The most probable populations are highlighted in grey.**

| MLST         |                     |                                    |           |                        |                            | Strains      | PST          |              |              |              |
|--------------|---------------------|------------------------------------|-----------|------------------------|----------------------------|--------------|--------------|--------------|--------------|--------------|
| hpEurope     | hpAsia2<br>hpEurope | hspMaori<br>hspEAsia<br>hspAmerind | hpAfrica2 | hpNEAfrica<br>hpEurope | hspWAfrica1<br>hspSAfrica1 |              | hpAfrica     | hpEAsia      | hpNEurope    | hpSWEurope   |
| 0.031        | <b>0.475</b>        | 0.095                              | 0.003     | 0.381                  | 0.015                      | Sw-C577-G    | 0.005        | 0.001        | <b>0.993</b> | 0.001        |
| <b>0.664</b> | 0.205               | 0.109                              | 0.001     | 0.003                  | 0.019                      | Sw-C520-G    | 0.197        | 0.001        | <b>0.801</b> | 0.001        |
| 0.369        | <b>0.622</b>        | 0.002                              | 0.001     | 0.002                  | 0.003                      | Sw-C388-G    | 0.007        | 0.003        | <b>0.989</b> | 0.001        |
| 0.491        | <b>0.493</b>        | 0.002                              | 0.006     | 0.007                  | 0.001                      | De-M53-M     | 0.018        | 0.003        | <b>0.978</b> | 0.002        |
| <b>0.536</b> | 0.421               | 0.014                              | 0.009     | 0.007                  | 0.013                      | Sw-C166-G    | 0.002        | 0.001        | <b>0.996</b> | 0.001        |
| <b>0.554</b> | 0.440               | 0.001                              | 0.001     | 0.002                  | 0.002                      | Sw-A626-G    | 0.006        | 0.002        | <b>0.991</b> | 0.001        |
| 0.121        | 0.005               | 0.002                              | 0.001     | 0.062                  | <b>0.810</b>               | Sn-DAK16-U   | <b>0.996</b> | 0.001        | 0.002        | 0.001        |
| <b>0.465</b> | 0.011               | 0.093                              | 0.001     | 0.010                  | 0.420                      | Fr-G12-G#    | 0.203        | <b>0.710</b> | 0.001        | 0.086        |
| 0.001        | 0.001               | 0.001                              | 0.000     | 0.002                  | <b>0.995</b>               | Fr-B41-M*    | 0.001        | 0.003        | 0.003        | <b>0.993</b> |
| 0.003        | 0.002               | 0.179                              | 0.003     | <b>0.809</b>           | 0.003                      | Tw-254-U#    | 0.001        | <b>0.762</b> | 0.001        | 0.235        |
| <b>0.590</b> | 0.043               | 0.001                              | 0.002     | 0.205                  | 0.159                      | Fr-B27-M#    | <b>0.901</b> | 0.015        | 0.081        | 0.003        |
| 0.006        | 0.004               | 0.003                              | 0.001     | 0.092                  | <b>0.894</b>               | Sn-DAK40-U   | <b>0.991</b> | 0.001        | 0.007        | 0.001        |
| 0.007        | 0.001               | 0.004                              | 0.006     | 0.004                  | <b>0.978</b>               | Sn-DAK34-U   | <b>0.996</b> | 0.001        | 0.001        | 0.002        |
| 0.052        | 0.001               | 0.016                              | 0.003     | 0.033                  | <b>0.895</b>               | Sn-DAK56-G   | <b>0.996</b> | 0.001        | 0.001        | 0.001        |
| 0.018        | 0.003               | <b>0.974</b>                       | 0.000     | 0.002                  | 0.002                      | Jp-206b-U    | 0.002        | <b>0.989</b> | 0.004        | 0.005        |
| 0.026        | 0.015               | <b>0.944</b>                       | 0.002     | 0.008                  | 0.004                      | Fr-B58-M     | 0.001        | <b>0.970</b> | 0.001        | 0.028        |
| 0.003        | 0.140               | <b>0.855</b>                       | 0.000     | 0.001                  | 0.001                      | Jp-G09-260-G | 0.075        | <b>0.784</b> | 0.135        | 0.005        |
| 0.158        | 0.003               | <b>0.830</b>                       | 0.001     | 0.004                  | 0.004                      | Vn-HN75-G    | 0.004        | <b>0.634</b> | 0.007        | 0.355        |
| <b>0.769</b> | 0.208               | 0.004                              | 0.001     | 0.009                  | 0.009                      | Fr-2417-U*   | <b>0.967</b> | 0.002        | 0.031        | 0.001        |
| <b>0.611</b> | 0.003               | 0.002                              | 0.001     | 0.373                  | 0.010                      | Pt-B101-G#   | <b>0.773</b> | 0.005        | 0.220        | 0.002        |
| <b>0.806</b> | 0.003               | 0.006                              | 0.000     | 0.066                  | 0.119                      | Pt-B104-U    | 0.001        | 0.001        | 0.001        | <b>0.997</b> |
| <b>0.569</b> | 0.397               | 0.015                              | 0.002     | 0.010                  | 0.006                      | Sw-569-U     | 0.403        | 0.005        | <b>0.588</b> | 0.003        |
| <b>0.650</b> | 0.341               | 0.004                              | 0.001     | 0.003                  | 0.001                      | Uk-EN31-U    | 0.001        | 0.001        | <b>0.998</b> | 0.001        |
| <b>0.576</b> | 0.415               | 0.002                              | 0.000     | 0.005                  | 0.001                      | Uk-EN32-U    | 0.001        | 0.001        | <b>0.998</b> | 0.001        |
| <b>0.519</b> | 0.001               | 0.002                              | 0.001     | 0.471                  | 0.006                      | Pt-5322-G#   | <b>0.995</b> | 0.001        | 0.003        | 0.001        |
| <b>0.662</b> | 0.001               | 0.003                              | 0.002     | 0.154                  | 0.178                      | Pt-4481-G#   | <b>0.677</b> | 0.003        | 0.319        | 0.001        |
| <b>0.580</b> | 0.007               | 0.015                              | 0.005     | 0.127                  | 0.265                      | Pt-212-U     | 0.001        | 0.002        | 0.001        | <b>0.996</b> |
| <b>0.918</b> | 0.016               | 0.007                              | 0.001     | 0.004                  | 0.053                      | Pt-1293-U*   | <b>0.997</b> | 0.001        | 0.001        | 0.001        |
| 0.007        | 0.001               | 0.002                              | 0.000     | 0.061                  | <b>0.928</b>               | Pt-1918-U*   | 0.001        | 0.001        | 0.000        | <b>0.998</b> |
| <b>0.848</b> | 0.020               | 0.002                              | 0.001     | 0.070                  | 0.059                      | Pt-B51-U#    | <b>0.982</b> | 0.002        | 0.015        | 0.001        |
| <b>0.851</b> | 0.001               | 0.001                              | 0.001     | 0.083                  | 0.064                      | Pt-B89-G#    | <b>0.753</b> | 0.001        | 0.245        | 0.001        |
| <b>0.760</b> | 0.006               | 0.003                              | 0.001     | 0.070                  | 0.161                      | Pt-B92-G#    | <b>0.751</b> | 0.001        | 0.246        | 0.001        |
| <b>0.766</b> | 0.002               | 0.003                              | 0.001     | 0.066                  | 0.163                      | Pt-259_01-G  | 0.000        | 0.001        | 0.001        | <b>0.998</b> |
| 0.431        | 0.002               | 0.003                              | 0.001     | <b>0.459</b>           | 0.104                      | Pt-670_99-G# | <b>0.994</b> | 0.002        | 0.003        | 0.001        |
| <b>0.962</b> | 0.007               | 0.006                              | 0.001     | 0.015                  | 0.011                      | Pt-5303-G    | 0.000        | 0.001        | 0.001        | <b>0.998</b> |
| <b>0.646</b> | 0.004               | 0.003                              | 0.001     | 0.006                  | 0.341                      | Pt-5771-G#   | <b>0.997</b> | 0.001        | 0.001        | 0.001        |
| <b>0.646</b> | 0.004               | 0.002                              | 0.001     | 0.002                  | 0.345                      | Pt-5783-U#   | <b>0.997</b> | 0.001        | 0.001        | 0.001        |
| 0.006        | 0.001               | 0.001                              | 0.010     | 0.013                  | <b>0.969</b>               | Pt-6691-G*   | 0.001        | 0.001        | 0.001        | <b>0.997</b> |
| 0.004        | 0.001               | 0.001                              | 0.001     | 0.004                  | <b>0.989</b>               | Pt-4497-U*   | 0.001        | 0.001        | 0.000        | <b>0.998</b> |
| <b>0.575</b> | 0.024               | 0.009                              | 0.001     | 0.295                  | 0.096                      | Il-3180-G#   | <b>0.896</b> | 0.020        | 0.083        | 0.001        |
| <b>0.781</b> | 0.003               | 0.056                              | 0.001     | 0.155                  | 0.006                      | Pt-4472-G    | 0.001        | 0.005        | 0.002        | <b>0.992</b> |

|              |              |              |              |       |              |              |              |              |              |              |
|--------------|--------------|--------------|--------------|-------|--------------|--------------|--------------|--------------|--------------|--------------|
| 0.004        | 0.315        | <b>0.678</b> | 0.000        | 0.001 | 0.001        | Pe-Cuz20#    | 0.019        | 0.250        | <b>0.730</b> | 0.001        |
| 0.102        | <b>0.703</b> | 0.146        | 0.001        | 0.044 | 0.003        | India7#      | 0.004        | 0.011        | <b>0.979</b> | 0.006        |
| <b>0.473</b> | 0.062        | 0.003        | 0.001        | 0.454 | 0.006        | My-UM037     | 0.001        | 0.290        | 0.010        | <b>0.699</b> |
| 0.040        | <b>0.495</b> | 0.449        | 0.004        | 0.006 | 0.006        | Ru-E48#      | 0.095        | 0.043        | <b>0.861</b> | 0.001        |
| 0.101        | 0.005        | 0.003        | 0.001        | 0.042 | <b>0.848</b> | Za-SA156A#   | 0.167        | 0.003        | <b>0.829</b> | 0.001        |
| 0.001        | 0.000        | 0.000        | <b>0.997</b> | 0.001 | 0.001        | Za-SA160A*/# | 0.435        | 0.027        | <b>0.525</b> | 0.012        |
| 0.019        | <b>0.679</b> | 0.295        | 0.001        | 0.003 | 0.003        | My-FD719-G*  | 0.481        | 0.014        | <b>0.503</b> | 0.001        |
| 0.012        | 0.003        | 0.001        | 0.001        | 0.192 | <b>0.790</b> | Us-HpP4-G#   | 0.206        | 0.001        | <b>0.792</b> | 0.001        |
| <b>0.607</b> | 0.059        | 0.031        | 0.001        | 0.262 | 0.040        | Co-NQ4044-I# | <b>0.870</b> | 0.003        | 0.082        | 0.045        |
| 0.054        | 0.002        | 0.002        | 0.001        | 0.182 | <b>0.760</b> | Gm-GAM83T    | <b>0.995</b> | 0.002        | 0.002        | 0.001        |
| 0.048        | 0.161        | 0.003        | 0.004        | 0.095 | <b>0.689</b> | Us-HpH41-U   | <b>0.712</b> | 0.007        | 0.280        | 0.001        |
| 0.004        | 0.001        | 0.001        | 0.010        | 0.174 | <b>0.810</b> | Gm-GAM105Ai  | <b>0.995</b> | 0.001        | 0.003        | 0.001        |
| 0.040        | 0.013        | 0.001        | 0.006        | 0.008 | <b>0.932</b> | Us-HpA4-U    | <b>0.979</b> | 0.003        | 0.017        | 0.001        |
| 0.049        | 0.002        | 0.002        | 0.001        | 0.082 | <b>0.865</b> | Us-HpA20-U   | <b>0.982</b> | 0.001        | 0.016        | 0.001        |
| 0.002        | 0.155        | <b>0.840</b> | 0.000        | 0.001 | 0.001        | Cn-YN4-84    | 0.003        | <b>0.837</b> | 0.006        | 0.153        |
| 0.001        | 0.001        | <b>0.996</b> | 0.001        | 0.001 | 0.000        | My-UM038     | 0.002        | <b>0.987</b> | 0.002        | 0.009        |
| 0.010        | <b>0.811</b> | 0.156        | 0.001        | 0.021 | 0.002        | My-FD430-G#  | 0.001        | <b>0.677</b> | 0.003        | 0.319        |
| 0.029        | <b>0.779</b> | 0.018        | 0.001        | 0.143 | 0.030        | My-UM114#    | 0.001        | <b>0.579</b> | 0.002        | 0.418        |
| 0.004        | 0.019        | <b>0.975</b> | 0.001        | 0.001 | 0.001        | Cn-wls5-1    | 0.011        | <b>0.552</b> | 0.002        | 0.435        |
| 0.070        | 0.003        | 0.004        | 0.001        | 0.014 | <b>0.908</b> | Za-SA226A*   | 0.001        | 0.002        | 0.001        | <b>0.997</b> |
| 0.196        | 0.002        | 0.003        | 0.001        | 0.016 | <b>0.783</b> | Za-SA161A#   | 0.001        | 0.002        | 0.001        | <b>0.997</b> |
| 0.007        | 0.002        | 0.002        | 0.001        | 0.006 | <b>0.982</b> | Us-HpH-34-G* | 0.001        | 0.106        | 0.001        | <b>0.893</b> |

\* Strains with probably more recently acquired prophages (no coincidence in the population structure). # Mosaic structure of MLST classification in agreement with PST classification or vice-versa.

MLST – multilocus sequence typing, PST - prophage sequence typing
